# Supplementary material
Source: PubMed Central journal article supplement (PMC3707992)
Supplement: supp_121377_suicide-colman-1-at.pdf [file supp_121377_suicide-colman-1-at.pdf]

Appendix 1 (as supplied by authors): Cross-sectional association between suicide by a schoolmate and suicidality outcomes in youth, assuming those who reported “I don’t know” regarding exposure to suicide were not exposed, OR (95% CI)

|                          | <b>Unadjusted</b> | <b>Partially Adjusted</b> | <b>Fully Adjusted</b> |
|--------------------------|-------------------|---------------------------|-----------------------|
| <b><u>Ages 12-13</u></b> |                   |                           |                       |
| <b>Ideation</b>          |                   |                           |                       |
| Exposure in Past Year    | 3.39 (2.09-5.50)  | 3.53 (2.15-5.81)          | 4.24 (2.37-7.58)      |
| Exposure > Year Ago      | 3.06 (1.98-4.74)  | 3.05 (1.97-4.73)          | 2.62 (1.62-4.25)      |
| No Exposure              | Reference         | Reference                 | Reference             |
| <b>Attempt</b>           |                   |                           |                       |
| Exposure in Past Year    | 3.14 (1.72-5.71)  | 3.18 (1.70-5.96)          | 3.74 (1.78-7.85)      |
| Exposure > Year Ago      | 3.98 (2.24-7.09)  | 3.91 (2.20-6.94)          | 3.34 (1.79-6.23)      |
| No Exposure              | Reference         | Reference                 | Reference             |
| <b><u>Ages 14-15</u></b> |                   |                           |                       |
| <b>Ideation</b>          |                   |                           |                       |
| Exposure in Past Year    | 1.74 (1.24-2.46)  | 1.73 (1.23-2.44)          | 1.89 (1.28-2.79)      |
| Exposure > Year Ago      | 1.72 (1.25-2.37)  | 1.66 (1.21-2.29)          | 1.55 (1.09-2.22)      |
| No Exposure              | Reference         | Reference                 | Reference             |
| <b>Attempt</b>           |                   |                           |                       |
| Exposure in Past Year    | 2.40 (1.56-3.70)  | 2.32 (1.51-3.56)          | 2.44 (1.49-3.98)      |
| Exposure > Year Ago      | 2.34 (1.54-3.54)  | 2.18 (1.44-3.29)          | 2.12 (1.32-3.41)      |
| No Exposure              | Reference         | Reference                 | Reference             |
| <b><u>Ages 16-17</u></b> |                   |                           |                       |
| <b>Ideation</b>          |                   |                           |                       |
| Exposure in Past Year    | 1.88 (1.29-2.74)  | 1.90 (1.30-2.78)          | 1.70 (1.07-2.71)      |
| Exposure > Year Ago      | 1.57 (1.07-2.31)  | 1.54 (1.04-2.27)          | 1.80 (1.13-2.86)      |
| No Exposure              | Reference         | Reference                 | Reference             |
| <b>Attempt</b>           |                   |                           |                       |
| Exposure in Past Year    | 2.27 (1.34-3.84)  | 2.31 (1.33-4.04)          | 2.66 (1.35-5.23)      |
| Exposure > Year Ago      | 1.64 (0.95-2.82)  | 1.58 (0.91-2.77)          | 1.60 (0.78-3.27)      |
| No Exposure              | Reference         | Reference                 | Reference             |

\*Partially adjusted models account for gender and socioeconomic status. For ages 14-15 and 16-17, fully adjusted models account for gender, socioeconomic status, prior depression/anxiety, prior monthly drinking episodes, and prior drug use. For ages 12-13, fully adjusted models account for gender, SES, and prior depression/anxiety.
