# Supplementary material
Source: PubMed Central journal article supplement (PMC3707992)
Supplement: supp_121377_suicide-colman-2-at.pdf [file supp_121377_suicide-colman-2-at.pdf]

Appendix 2 (as supplied by authors): Cross-sectional association between suicide by someone personally known and suicidality outcomes in youth, assuming those who reported “I don’t know” regarding exposure to suicide were not exposed, OR (95% CI)

|                          | Unadjusted       | Partially Adjusted | Fully Adjusted   |
|--------------------------|------------------|--------------------|------------------|
| <b><u>Ages 12-13</u></b> |                  |                    |                  |
| <b>Ideation</b>          |                  |                    |                  |
| Exposure in Past Year    | 2.88 (1.75-4.75) | 2.92 (1.75-4.88)   | 3.58 (1.99-6.47) |
| Exposure > Year Ago      | 1.64 (1.12-2.42) | 1.66 (1.13-2.44)   | 1.56 (0.99-2.45) |
| No Exposure              | Reference        | Reference          | Reference        |
| <b>Attempt</b>           |                  |                    |                  |
| Exposure in Past Year    | 2.20 (1.14-4.24) | 2.14 (1.09-4.22)   | 2.70 (1.28-5.70) |
| Exposure > Year Ago      | 2.38 (1.45-3.90) | 2.37 (1.44-3.90)   | 2.33 (1.29-4.20) |
| No Exposure              | Reference        | Reference          | Reference        |
| <b><u>Ages 14-15</u></b> |                  |                    |                  |
| <b>Ideation</b>          |                  |                    |                  |
| Exposure in Past Year    | 2.45 (1.67-3.59) | 2.26 (1.54-3.31)   | 2.46 (1.56-3.88) |
| Exposure > Year Ago      | 2.16 (1.59-2.94) | 1.95 (1.43-2.67)   | 1.96 (1.36-2.84) |
| No Exposure              | Reference        | Reference          | Reference        |
| <b>Attempt</b>           |                  |                    |                  |
| Exposure in Past Year    | 3.64 (2.33-5.68) | 3.26 (2.08 – 5.11) | 3.36 (1.96-5.76) |
| Exposure > Year Ago      | 2.39 (1.63-3.51) | 2.10 (1.41 – 3.12) | 1.94 (1.21-3.11) |
| No Exposure              | Reference        | Reference          | Reference        |
| <b><u>Ages 16-17</u></b> |                  |                    |                  |
| <b>Ideation</b>          |                  |                    |                  |
| Exposure in Past Year    | 1.75 (1.14-2.70) | 1.74 (1.13-2.69)   | 1.73 (1.05-2.83) |
| Exposure > Year Ago      | 1.99 (1.43-2.77) | 1.80 (1.28- 2.52)  | 1.69 (1.12-2.56) |
| No Exposure              | Reference        | Reference          | Reference        |
| <b>Attempt</b>           |                  |                    |                  |
| Exposure in Past Year    | 2.46 (1.41-4.31) | 2.44 (1.37-4.34)   | 2.69 (1.35-5.36) |
| Exposure > Year Ago      | 2.36 (1.50-3.71) | 1.99 (1.23-3.22)   | 1.96 (1.07-3.59) |
| No Exposure              | Reference        | Reference          | Reference        |

\*Partially adjusted models account for gender and socioeconomic status. For ages 14-15 and 16-17, fully adjusted models account for gender, socioeconomic status, prior depression/anxiety, prior monthly drinking episodes, and prior drug use. For ages 12-13, fully adjusted models account for gender, socioeconomic status, and prior depression/anxiety.
