# Supplementary material
Source: PubMed Central journal article supplement (PMC3707992)
Supplement: supp_121377_suicide-colman-3-at.pdf [file supp_121377_suicide-colman-3-at.pdf]

Appendix 3 (as supplied by authors): Prospective association between exposure to suicide and suicidality outcomes two years later, assuming those who reported “I don’t know” regarding exposure to suicide were not exposed, OR (95% CI)

|                                                                                 | <b>Unadjusted</b> | <b>Partially Adjusted</b> | <b>Fully Adjusted</b> |
|---------------------------------------------------------------------------------|-------------------|---------------------------|-----------------------|
| <b><u>Exposure to suicide of a schoolmate</u></b>                               |                   |                           |                       |
| <b><u>Ages 12-13</u></b>                                                        |                   |                           |                       |
| <b>Ideation</b>                                                                 | 1.09 (0.48-2.47)  | 1.22 (0.54-2.75)          | 0.65 (0.22-1.91)      |
| <b>Attempt</b>                                                                  | 1.87 (0.64-5.45)  | 2.15 (0.74-6.28)          | 0.95 (0.18-4.97)      |
| <b><u>Ages 14-15</u></b>                                                        |                   |                           |                       |
| <b>Ideation</b>                                                                 | 1.32 (0.86-2.01)  | 1.31 (0.86-2.00)          | 1.44 (0.91-2.30)      |
| <b>Attempt</b>                                                                  | 1.74 (0.98-3.06)  | 1.70 (0.96-3.01)          | 1.80 (0.94-3.46)      |
| <b><u>Exposure to suicide of someone personally known by the respondent</u></b> |                   |                           |                       |
| <b><u>Ages 12-13</u></b>                                                        |                   |                           |                       |
| <b>Ideation</b>                                                                 | 1.20 (0.60-2.38)  | 1.26 (0.63-2.52)          | 1.24 (0.59-2.62)      |
| <b>Attempt</b>                                                                  | 1.42 (0.58-3.50)  | 1.51 (0.60-3.76)          | 1.62 (0.57-4.61)      |
| <b><u>Ages 14-15</u></b>                                                        |                   |                           |                       |
| <b>Ideation</b>                                                                 | 1.48 (0.93-2.36)  | 1.42 (0.90-2.24)          | 1.39 (0.82-2.35)      |
| <b>Attempt</b>                                                                  | 2.03 (1.06-3.90)  | 1.87 (0.98-3.57)          | 1.77 (0.83-3.80)      |

\*Partially adjusted models account for gender and socioeconomic status. For ages 14-15 and 16-17, fully adjusted models account for gender, socioeconomic status, prior depression/anxiety, prior monthly drinking episodes, and prior drug use. For ages 12-13, fully adjusted models account for gender, socioeconomic status, and prior depression/anxiety.
